# Supplementary material for: CMTM6 shapes antitumor T cell response through modulating protein expression of CD58 and PD-L1
Source: PubMed Central journal article supplement (PMC11113010; doi:10.1016/j.ccell.2023.08.008), 2023-09-07
Supplement: NIHMS1981828-supplement-Table_S1.pdf [file NIHMS1981828-supplement-Table_S1.pdf]

**Table S1. Patient-characteristics of the melanoma cohort, Related to Figure 4**

| Overall (n=88)                                   |                      |
|--------------------------------------------------|----------------------|
| Male (%)                                         | 54 (61.4)            |
| Age <sup>a</sup> (years, median, IQR)            | 62.5 (53.8, 69.5)    |
| M-stage <sup>a,b</sup> (%)                       |                      |
| M1a                                              | 16 (18.2)            |
| M1b                                              | 8 (9.1)              |
| M1c                                              | 44 (50.0)            |
| M1d                                              | 20 (22.7)            |
| BRAF V600E/K positive (%)                        | 31 (35.2)            |
| Lactate dehydrogenase <sup>a</sup> (median, IQR) | 189.0 (156.0, 238.0) |
| Treatment before biopsy (%)                      |                      |
| Ipilimumab                                       | 43 (48.9)            |
| Targeted therapy                                 | 14 (15.9)            |
| TIL-therapy                                      | 1 (1.1)              |
| Treatment (%)                                    |                      |
| Anti-PD1 monotherapy                             | 82 (93.2)            |
| Anti-PD1 + anti-CTLA4                            | 6 (6.7)              |

<sup>a</sup>At start treatment; <sup>b</sup> M-stage according to the 8th edition American Joint Committee on Cancer (AJCC8) cancer staging system. IQR, interquartile range.
